# Supplementary material
Source: PubMed Central journal article supplement (PMC9903624)
Supplement: mmc6.pdf [file mmc6.pdf]

**A**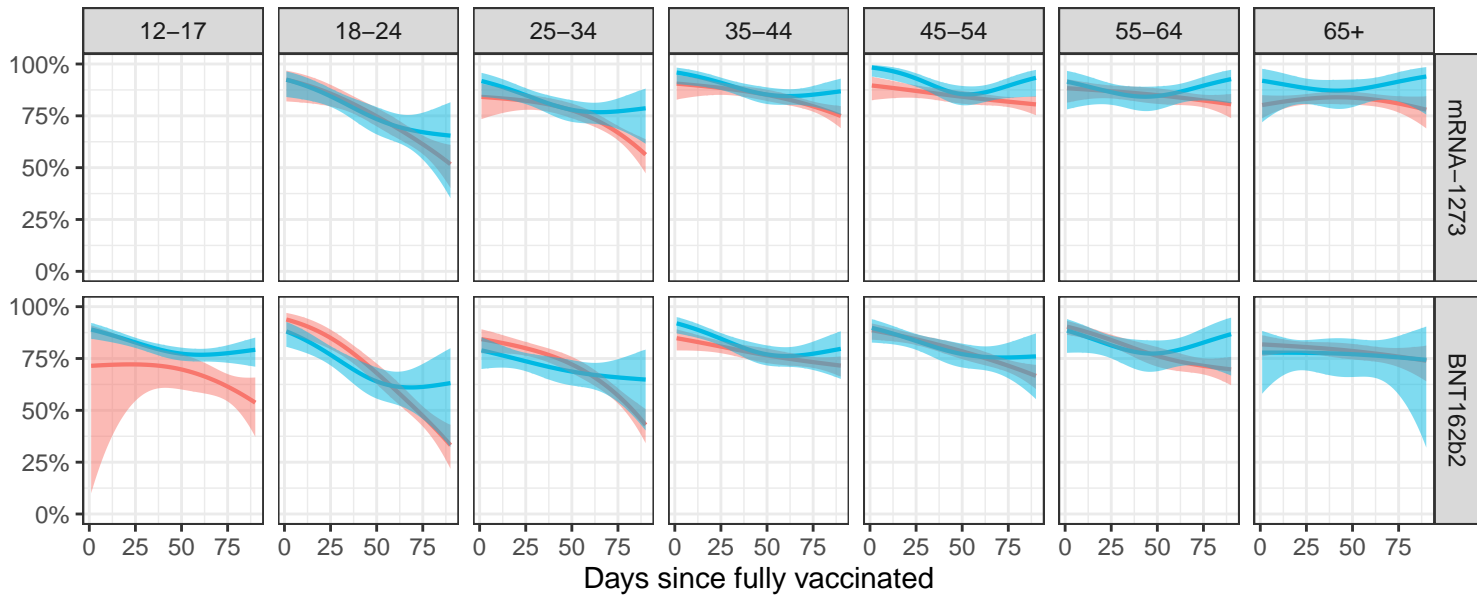

— Before June 15, 2021    — After June 15, 2021
