# Supplementary material
Source: PubMed Central journal article supplement (PMC9903624)
Supplement: mmc7.pdf [file mmc7.pdf]

**A**

COVID-19 hospitalizations

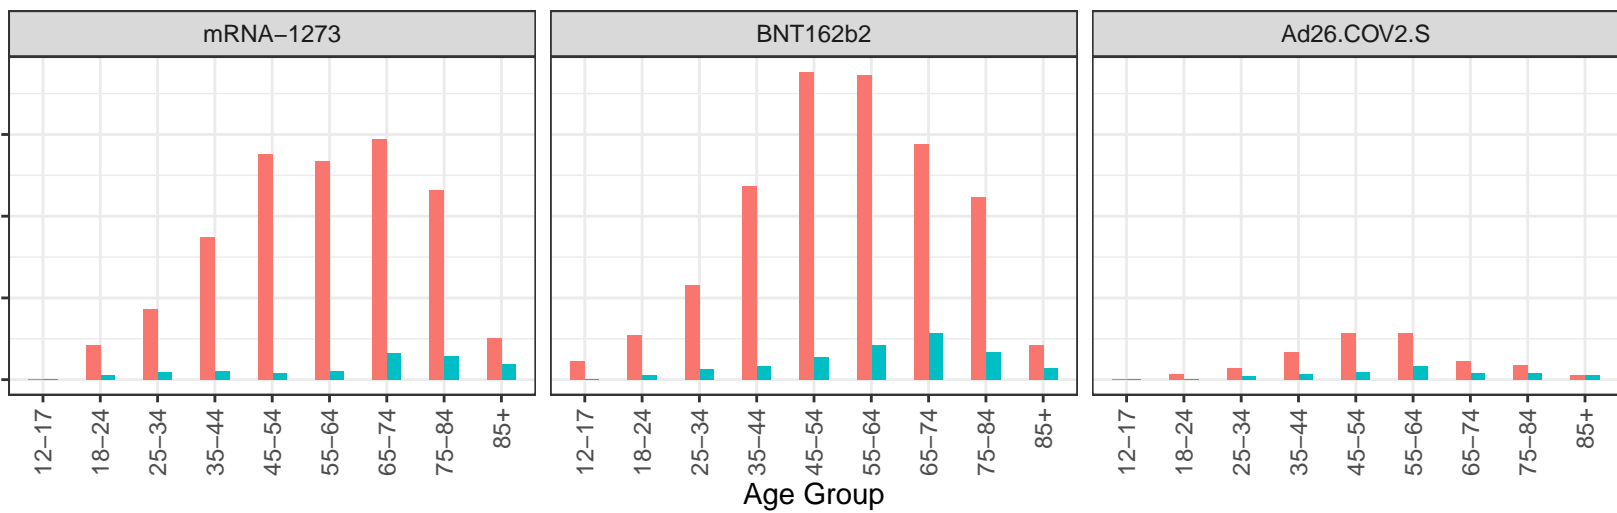**B**

COVID-19 deaths

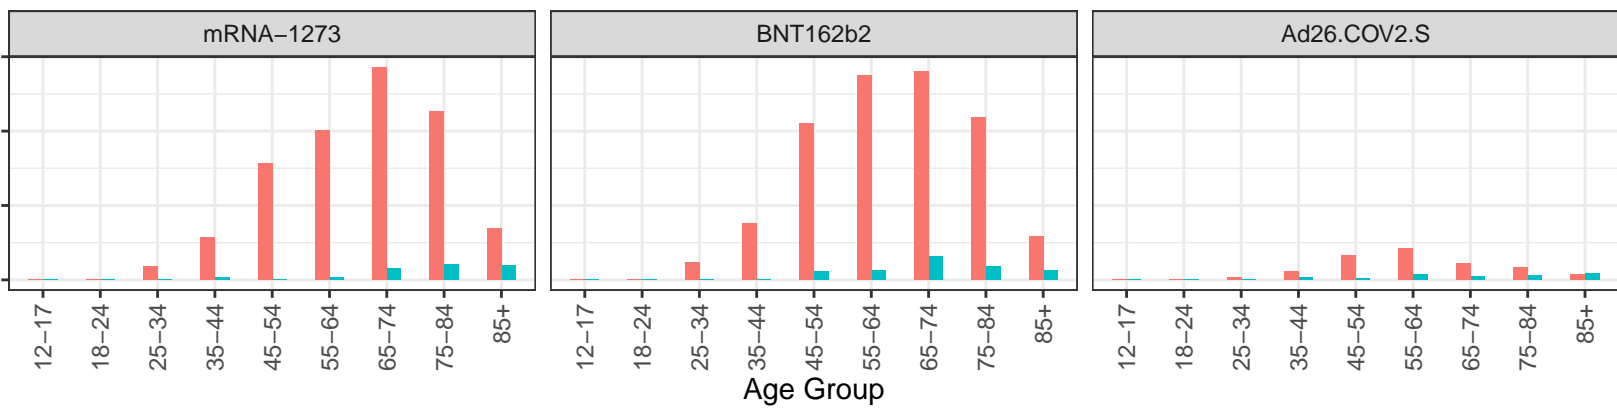

Expected Observed
