# Supplementary material
Source: PubMed Central journal article supplement (PMC9903624)
Supplement: mmc8.pdf [file mmc8.pdf]

**B**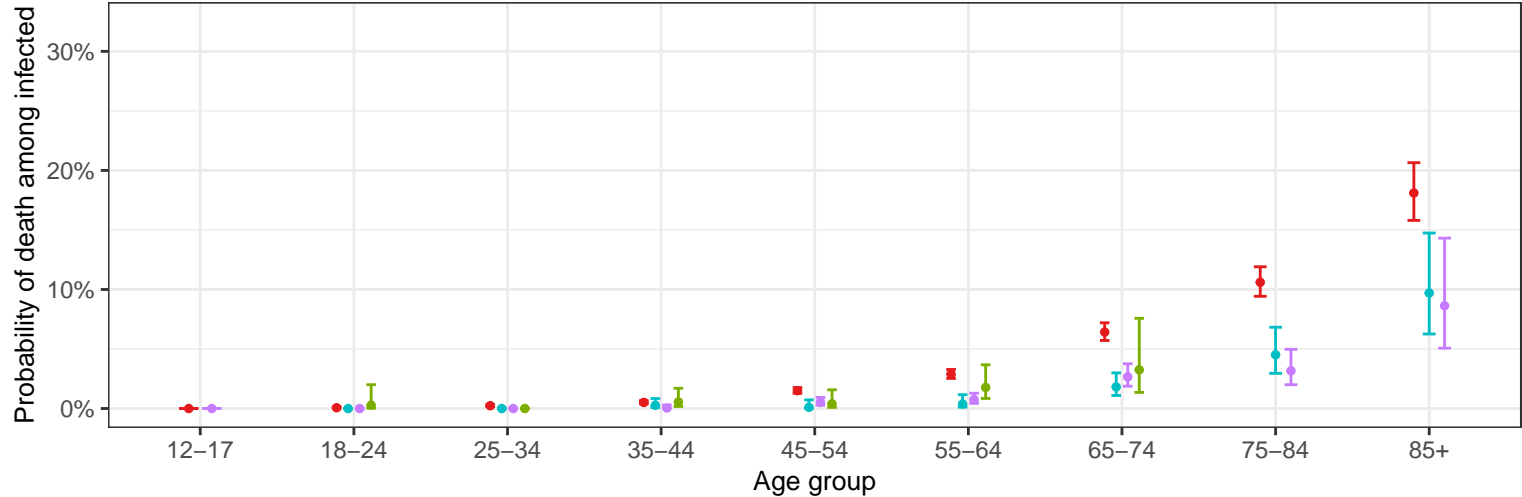

—●— Unvaccinated —●— mRNA-1273 —●— BNT162b2 —●— Ad26.COVS.2.S
