# Supplementary material
Source: PubMed Central journal article supplement (PMC9903624)

A

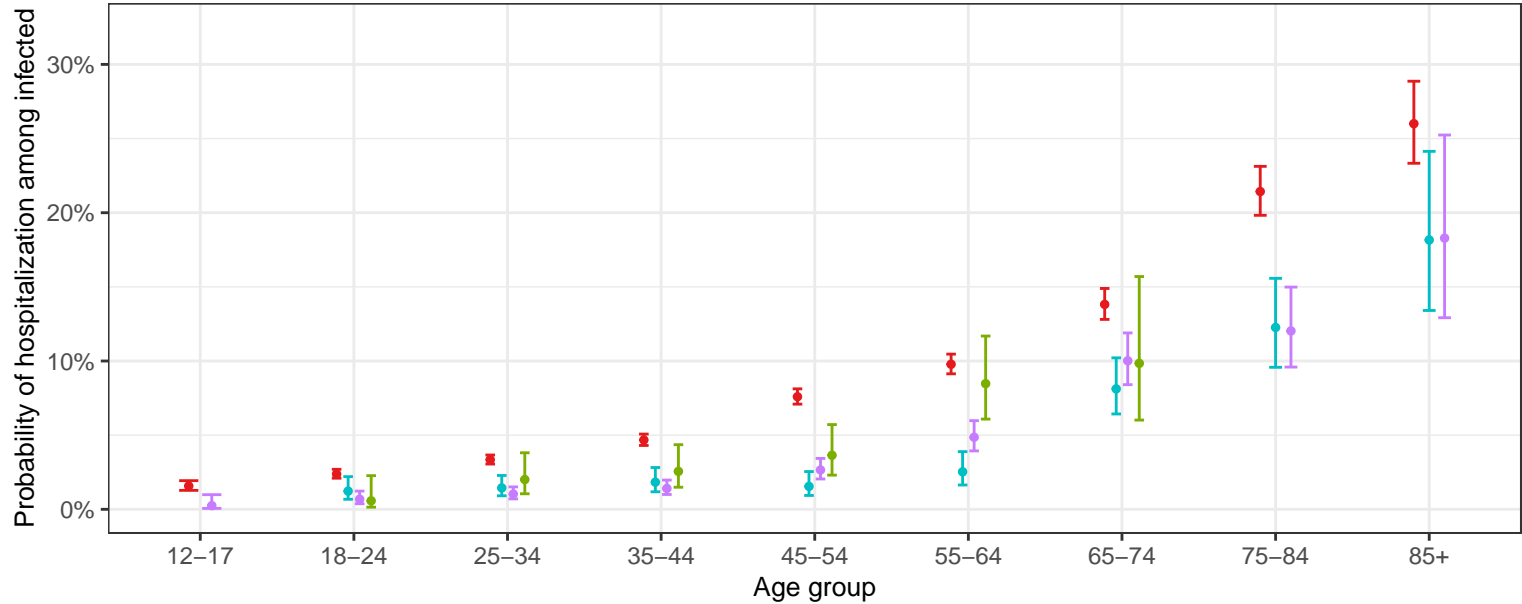

Supplement: mmc9.pdf [file mmc9.pdf]
