# Supplementary material
Source: PubMed Central journal article supplement (PMC9903624)
Supplement: mmc10.pdf [file mmc10.pdf]

Fully vaccinated individuals

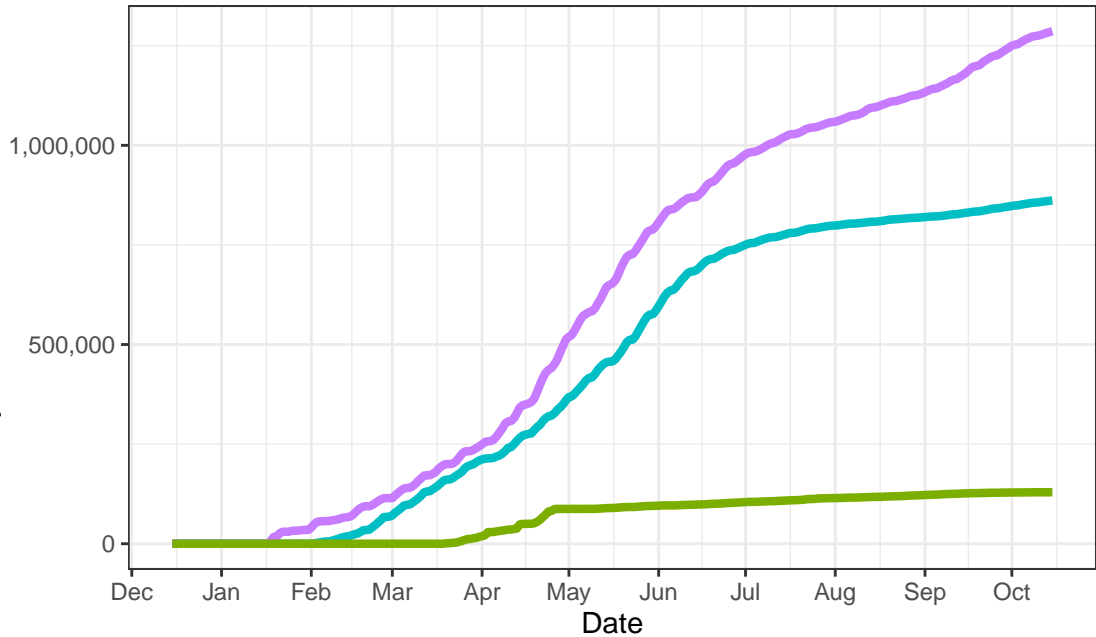

Vaccine mRNA-1273 BNT162b2 Ad26.COV2.S
