# Supplementary material
Source: PubMed Central journal article supplement (PMC9903624)

Fully vaccinated individuals

mRNA-1273

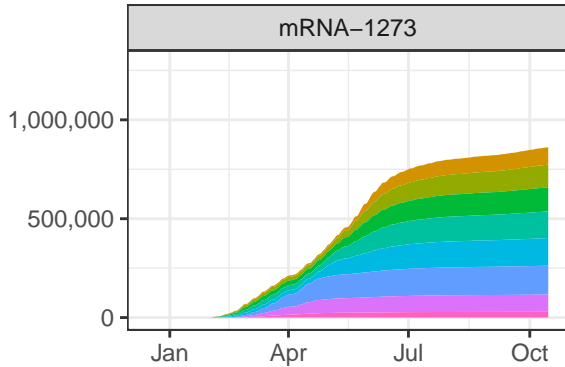

BNT162b2

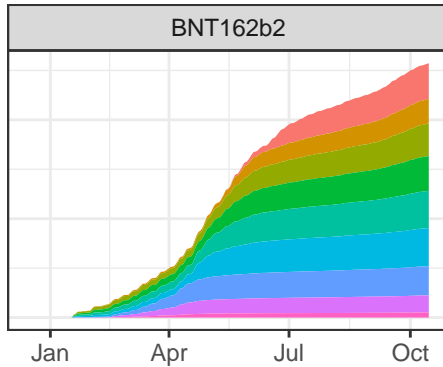

Ad26.COV2.S

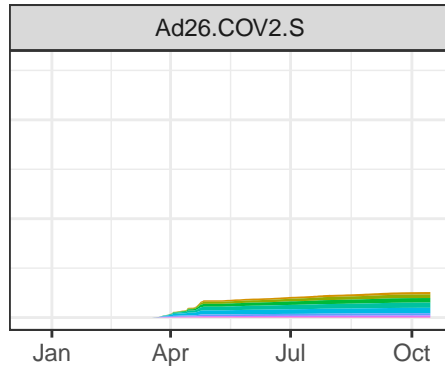

Date

Age group

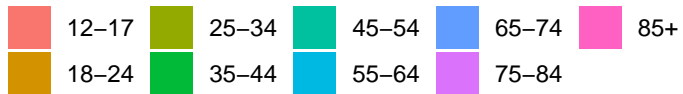

Supplement: mmc11.pdf [file mmc11.pdf]
