# Supplementary material
Source: PubMed Central journal article supplement (PMC9903624)

A

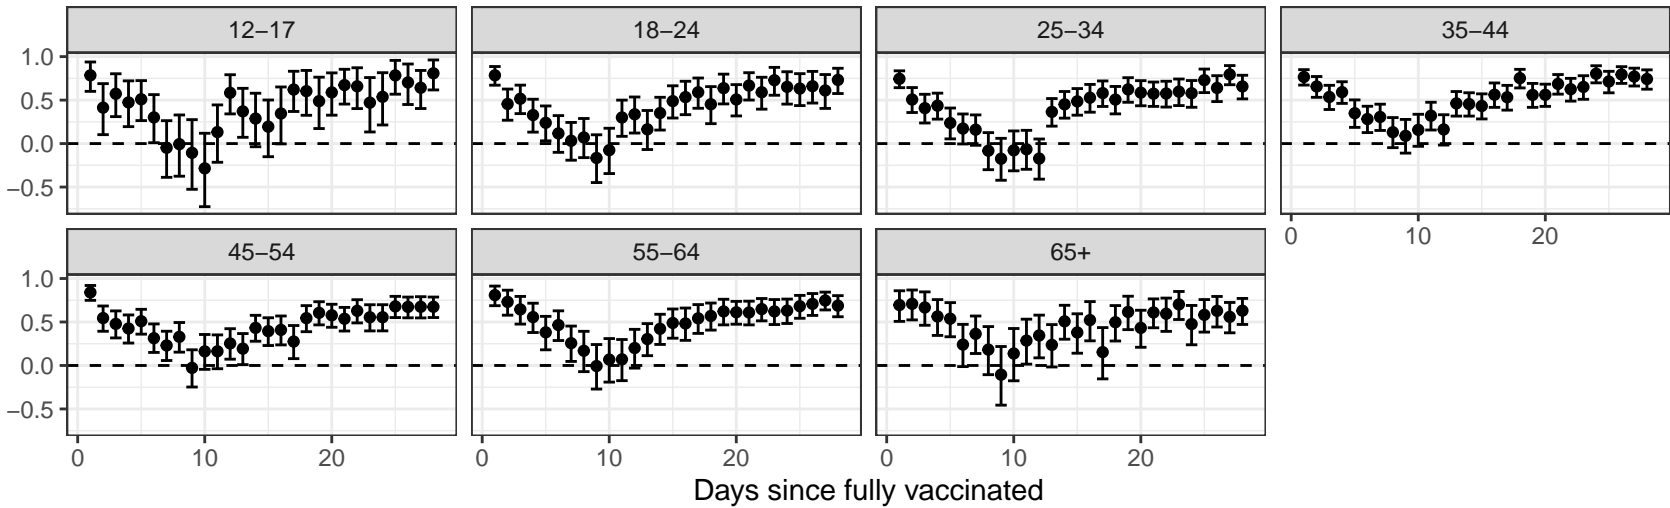

Supplement: mmc12.pdf [file mmc12.pdf]
