# Supplementary material
Source: PubMed Central journal article supplement (PMC9903624)
Supplement: mmc13.pdf [file mmc13.pdf]

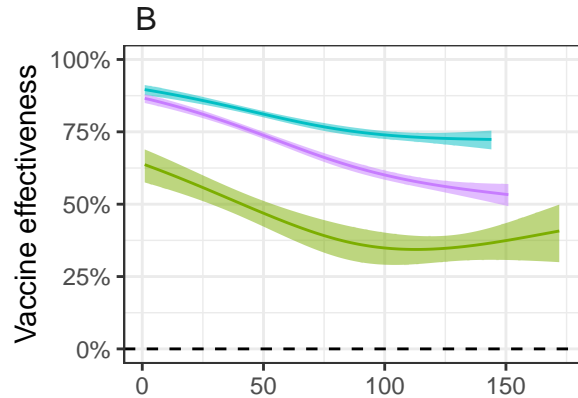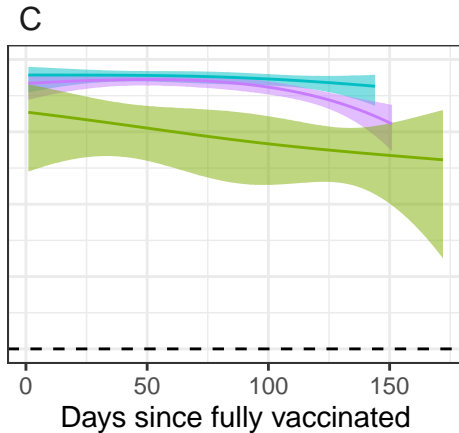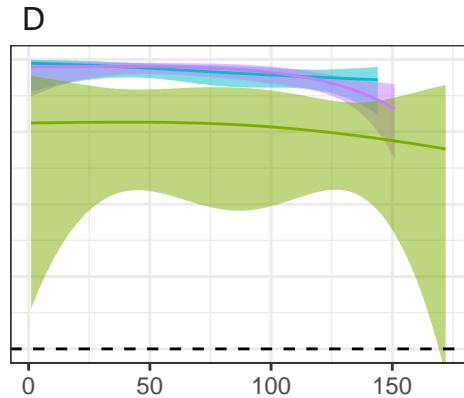

Vaccine — mRNA-1273 — BNT162b2 — Ad26.COV2.S
