# Supplementary material
Source: PubMed Central journal article supplement (PMC9903624)
Supplement: mmc14.pdf [file mmc14.pdf]

Risk of hospitalization given infection

65-74

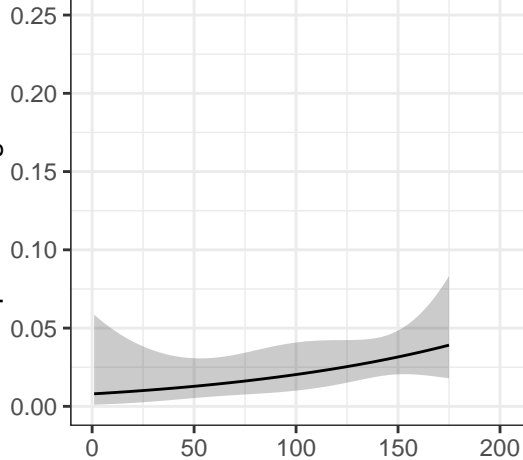

75-84

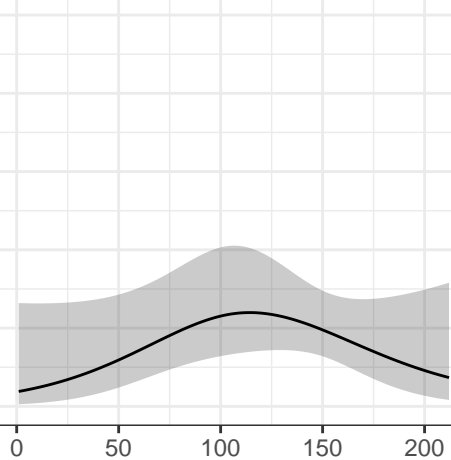

85+

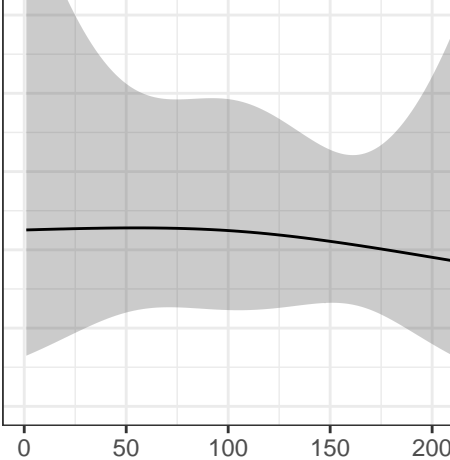

Days since fully vaccinated
