# Supplementary material
Source: PubMed Central journal article supplement (PMC9903624)
Supplement: mmc15.pdf [file mmc15.pdf]

Risk of hospitalization  
given infection

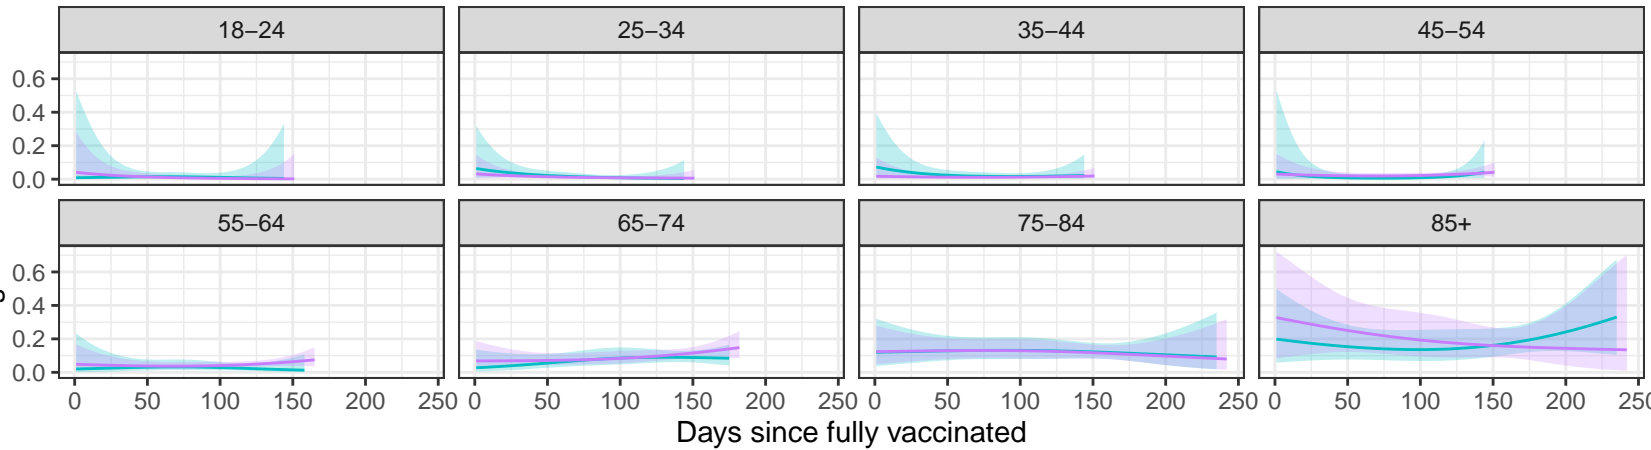

Vaccine mRNA-1273 BNT162b2
