# Supplementary material
Source: PubMed Central journal article supplement (PMC9903624)
Supplement: mmc16.pdf [file mmc16.pdf]

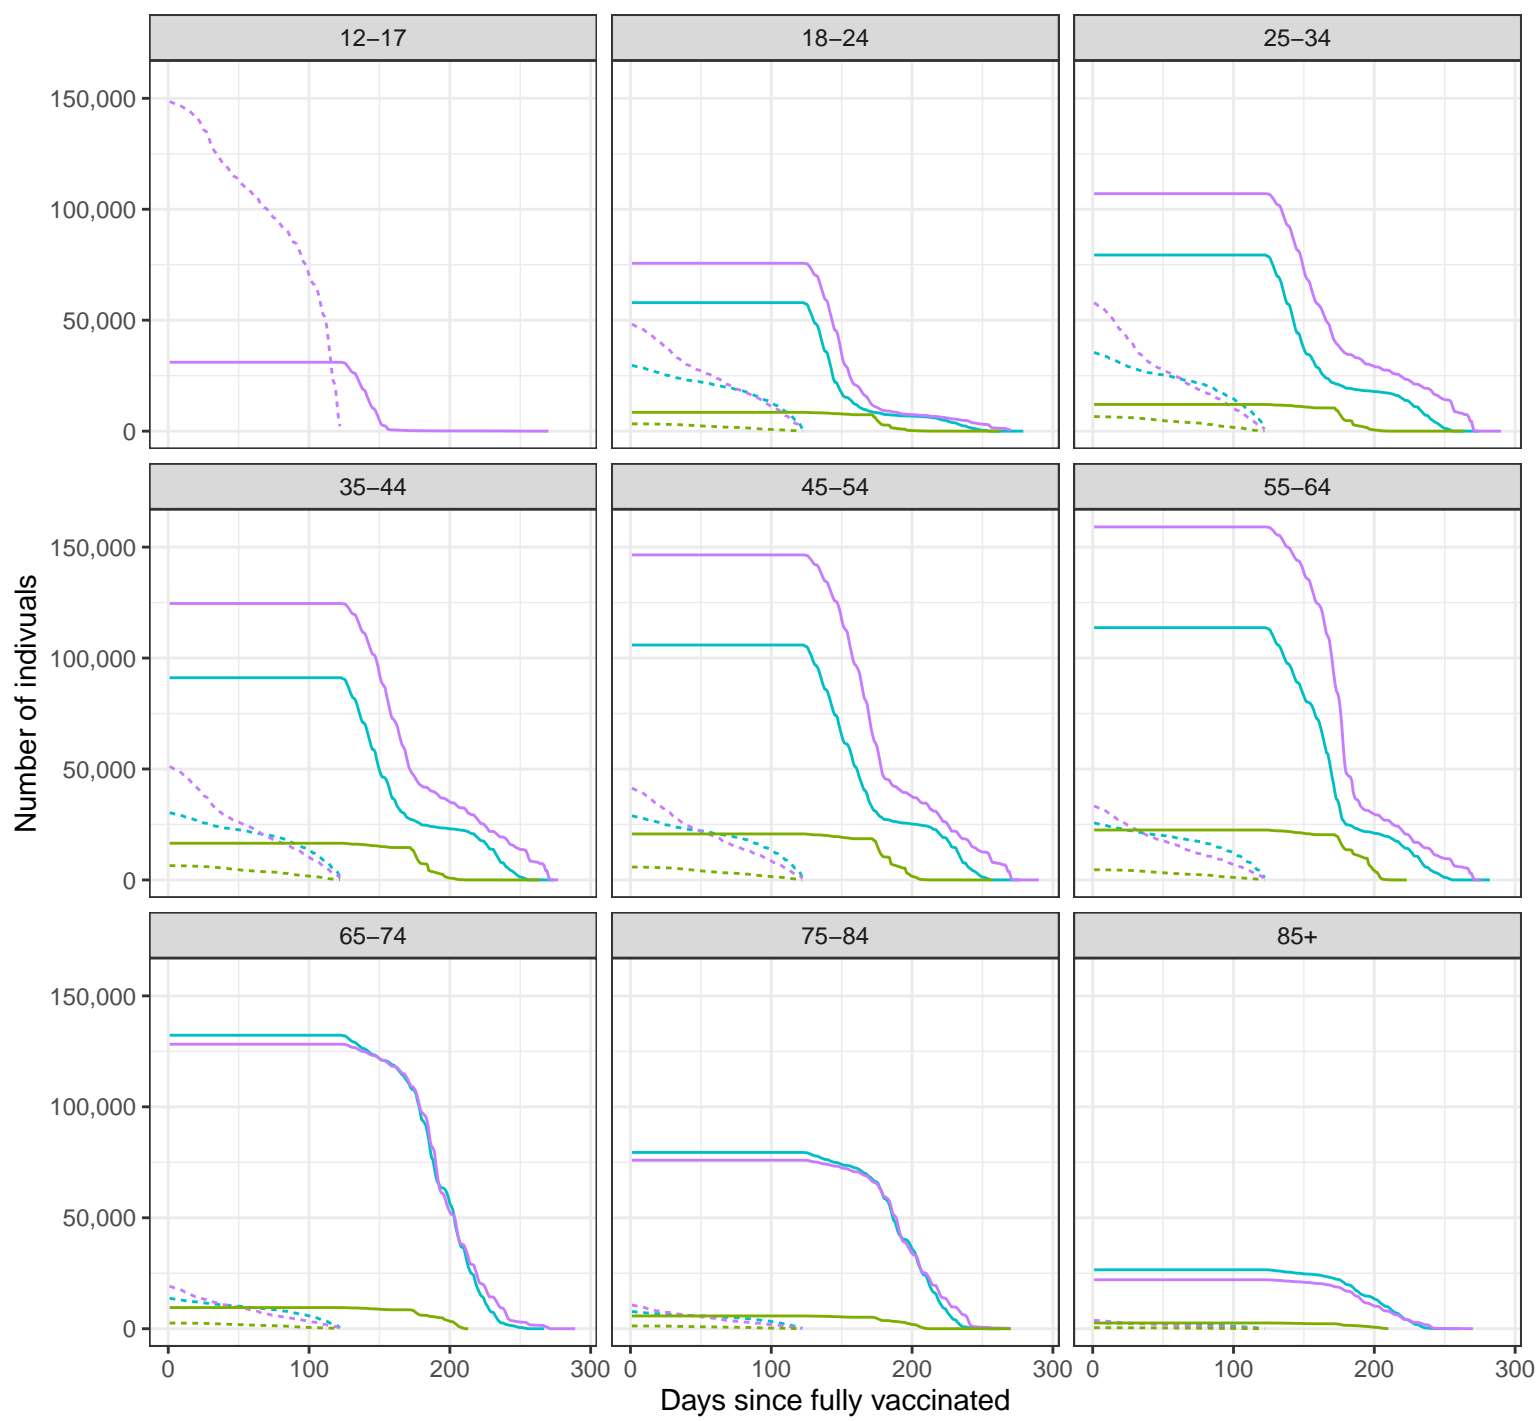

Vaccine   mRNA-1273   BNT162b2   Ad26.COVS.2   — Before June 15, 2021   - - - After June 15, 2021
